# Supplementary material for: Screening of C. auris among Candida isolates from various tertiary care institutions in Lahore by VITEK 2 and real time PCR based molecular technique
Source: PubMed Central journal article supplement (PMC10597507; doi:10.1371/journal.pone.0293390), 2023-10-24
Supplement: pone.0293390.s002.pdf [file pone.0293390.s002.pdf]

**Reviewer Recommendation and Comments for Manuscript Number  
PONE-D-23-13143**

|                                        |                                                                                                                                                                                                                                                                                                                                                                                                                                                                                                                                                                                                                                                                                                                                  |
|----------------------------------------|----------------------------------------------------------------------------------------------------------------------------------------------------------------------------------------------------------------------------------------------------------------------------------------------------------------------------------------------------------------------------------------------------------------------------------------------------------------------------------------------------------------------------------------------------------------------------------------------------------------------------------------------------------------------------------------------------------------------------------|
| <b>Article Title:</b>                  | Molecular Identification of <i>Candida auris</i> by VITEK 2 and ITS-1 and ITS-2 regions of rDNA to early detect and limit infection in hospital setting of Lahore, Pakistan                                                                                                                                                                                                                                                                                                                                                                                                                                                                                                                                                      |
| <b>Comments &amp; Recommendations:</b> | The title of the article is not suitable and it should be revised because the author did not identify any single isolate as <i>Candida auris</i> by any technique. However, she tried to screen the <i>C. auris</i> in the samples. One of the proposed title in my opinion is, “ <b>Screening of <i>C. auris</i> among <i>Candida</i> isolates from various tertiary care institutions in Lahore by VITEK 2 and real time PCR based molecular technique</b> ”.                                                                                                                                                                                                                                                                  |
| <b>Methodology:</b>                    | The author collected <i>Candida</i> isolates from different tertiary care institution of Lahore and screened them for the presence of <i>C. auris</i> by testing Fluconazole @ 25µg.                                                                                                                                                                                                                                                                                                                                                                                                                                                                                                                                             |
| <b>Comments &amp; Recommendations:</b> | It may be mentioned here that Minimum Inhibitory Concentration for <i>C. auris</i> is known to be $\geq 32\mu\text{g}$ , therefore if any one desired to screen on the basis of fluconazole resistance then the used concentration should be appropriate. Moreover, the best antifungal activity against <i>C. auris</i> is known by the use of Echinocandins (Please refer Sanyaolau <i>et al.</i> , 2022; <a href="https://doi.org/10.3947/ic.2022.0008">https://doi.org/10.3947/ic.2022.0008</a> ). Therefore, the author is advised to screen Echinocandins rather than Fluconazole. More references may be found if properly searched.                                                                                      |
| <b>Results:</b>                        | The author mentioned that she screened 636 <i>Candida</i> isolates and for fluconazole resistance and found resistance in 248 (38.9%) isolates, and identify 87 isolates as different <i>Candida</i> species on the basis of VITEK 2 ID Compact System and performed RT-PCR on selected isolates (n=100).                                                                                                                                                                                                                                                                                                                                                                                                                        |
| <b>Comments &amp; Recommendations:</b> | The author did not mention the criteria for selecting 87 and 100 isolates rather than testing all 248 fluconazole resistant <i>Candida</i> isolates. However, she is claiming that <i>C. auris</i> could not be identify from collected samples.<br>It is suggested that to author to: <ul style="list-style-type: none"> <li>• Screen isolates resistant isolates using echinocandins or any other or appropriate concentration of fluconazole antifungal.</li> <li>• Test all resistant <i>Candida</i> isolates or all collected isolates using VITEK 2 ID Compact System and RT-PCR.</li> <li>• The author is also advised to use any control sample (positive control) for comparing the amplification on RT-PCR.</li> </ul> |

|                                                |                                                                                                                                                                                                                                                                                                                                                                                               |
|------------------------------------------------|-----------------------------------------------------------------------------------------------------------------------------------------------------------------------------------------------------------------------------------------------------------------------------------------------------------------------------------------------------------------------------------------------|
| <b>Statistical Analysis:</b>                   | The author did not perform any statistical analysis                                                                                                                                                                                                                                                                                                                                           |
| <b>Comments &amp; Recommendations:</b>         | The author is advised to” <ul style="list-style-type: none"><li>• Mention the name of institutes form where the samples were collected with exact numbers and gender.</li><li>• The data may be classified into various institutes/hospitals and gender (male &amp; female).</li><li>• The data may analyze statistically in terms of means, standard error and standard deviation.</li></ul> |
| <b>Overall Comments &amp; Recommendations:</b> | The manuscript may be sent to author for major revision. The manuscript may be accepted after incorporating all the comments.                                                                                                                                                                                                                                                                 |
